# Supplementary material
Source: HighWire-hosted journal article supplement (http://d2538ggaoe6cji.cloudfront.net/highwire/filestream/21150/field_highwire_adjunct_files/0/076653-1.pdf)
Supplement: 076653-1.pdf [file 076653-1.pdf]

# Supplemental Material

## Alternative splicing events as cancer drivers

Héctor Climente-González<sup>1</sup>, Eduard Porta-Pardo<sup>2</sup>, Adam Godzik<sup>2</sup>, Eduardo Eyras<sup>1,3</sup>

<sup>1</sup>Universitat Pompeu Fabra (UPF), Barcelona, Spain

<sup>2</sup>Sanford Burnham Prebys Medical Discovery Institute, La Jolla, CA, 92037, USA

<sup>3</sup>Institució Catalana de Recerca i Estudis Avançats (ICREA), Barcelona, Spain

|                                      |    |
|--------------------------------------|----|
| Supplemental Data                    | 2  |
| <i>Related to Figure 1</i>           |    |
| Figure S1                            | 2  |
| Table S1                             | 3  |
| <i>Related to Figure 2</i>           |    |
| Figure S2                            | 4  |
| Table S2                             | 5  |
| Table 23                             | 5  |
| <i>Related to Figure 3</i>           |    |
| Figure S3                            | 6  |
| Figure S4                            | 7  |
| Figure S5                            | 9  |
| Table S4                             | 10 |
| Table S5                             | 10 |
| Table S6                             | 11 |
| Supplemental Experimental Procedures | 12 |
| Supplemental References              | 13 |

# Supplemental Data

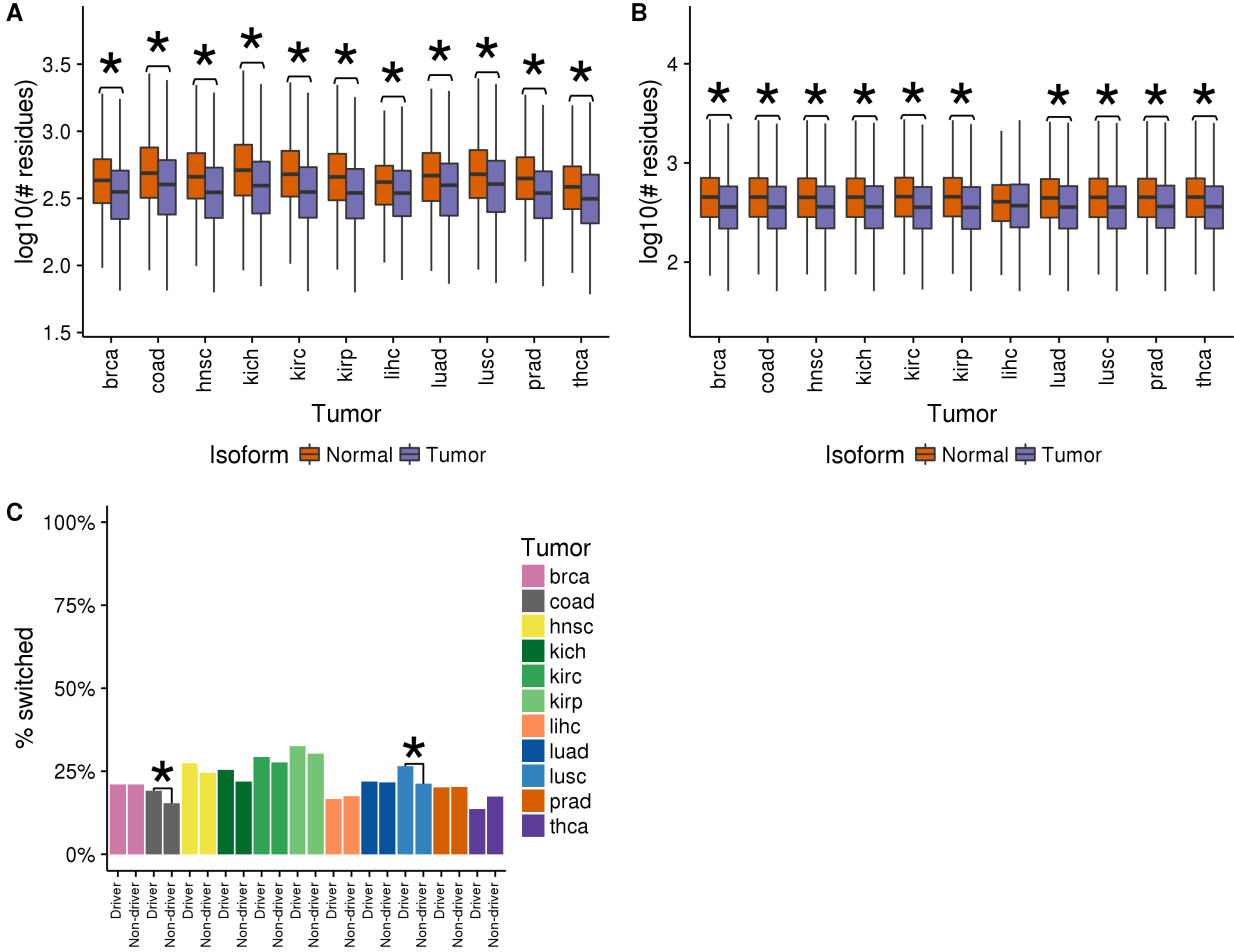

**Figure S1. Properties of isoform switches in tumors.** Related to Figure 1. **(A)** Distributions of the lengths of the tumor and normal protein isoforms in the calculated isoform switches. The y-axis indicates the number of residues in log10 scale. **(B)** Distributions of the lengths of the tumor and normal protein isoforms in the simulated alternative splicing switches. **(C)** For each tumor type, we give the proportions of genes with alternative transcript isoforms that present a switch, separated according to whether they are cancer drivers or not. Except for liver, prostate and thyroid tumors, in all cases there is a higher proportion of drivers with switches. We indicate with an asterisk those cases that are statistically significant.

**Table S1. Properties of Isoform switches.** Related to Figure 1. Provided as a text file with tab-separated values (.tsv). This table contains the list of identified isoform switches used for this analysis, including functional and nonfunctional ones, and AS-drivers. The table provides the following information:

| Column number | Column label            | Description                                                                                                                                        |
|---------------|-------------------------|----------------------------------------------------------------------------------------------------------------------------------------------------|
| 1             | Genelid                 | Entrez gene id                                                                                                                                     |
| 2             | Symbol                  | HGNC gene symbol                                                                                                                                   |
| 3             | Normal_transcript       | UCSC transcript id                                                                                                                                 |
| 4             | Tumor_transcript        | UCSC transcript id                                                                                                                                 |
| 5             | Normal_protein          | Swissprot ID (None if not known)                                                                                                                   |
| 6             | Tumor_protein           | Swissprot ID (None if not known)                                                                                                                   |
| 7             | DriverAnnotation        | “Driver” if it’s a driver, “d1” if it’s an interactor of a driver, and “Nothing” otherwise                                                         |
| 8             | IsFunctional            | 1 if it is functional as defined in the article, 0 otherwise                                                                                       |
| 9             | Driver                  | 1 if it is a driver, 0 otherwise                                                                                                                   |
| 10            | Druggable               | 1 if it is a target of a known drug according to DGIdb ( <a href="http://dgidb.genome.wustl.edu/">http://dgidb.genome.wustl.edu/</a> )             |
| 11            | CDS_Normal              | 1 if the normal transcript has an annotated CDS, 0 otherwise                                                                                       |
| 12            | CDS_Tumor               | 1 if the tumor transcript has an annotated CDS, 0 otherwise                                                                                        |
| 13            | CDS_change              | 1 if the CDS changes between the tumor and normal transcripts                                                                                      |
| 14            | UTR_change              | 1 if the 5’3 or 3’ UTRs change between the tumor and normal transcripts                                                                            |
| 15            | Tumors                  | Tumor types in which the switch appears (brca, coad, etc...)                                                                                       |
| 16            | Number_samples          | Number of samples in which the switch appears                                                                                                      |
| 17            | Percentage_samples      | Percentage of samples from the total studied across all tumor types in which the switch appears                                                    |
| 18            | Samples                 | IDs of samples in which the switch appears                                                                                                         |
| 19            | Recurrence              | 1 if it is recurrent, 0 otherwise                                                                                                                  |
| 20            | PPI                     | 1 if the switch affects a PPI in every tumor type where it appears; 0 otherwise. All PPIs affected by switches per tumor type are in Supp. File 3. |
| 21            | Affects_mutated_feature | 1 if the switch leads to a gain or loss of a domain that is enriched in mutations in tumors, 0 otherwise                                           |
| 22            | Pannegative             | 1 if the switch is mutually exclusive with 3 or cancer drivers and share a pathway with a cancer driver, 0 otherwise                               |
| 23            | AS_driver               | 1 if 19,20,21 or 22 is equal to 1, 0 otherwise                                                                                                     |
| 24            | MS.pam                  | Samples with co-occurrence of switch and PAM in the same gene                                                                                      |
| 25            | M.pam                   | Samples with PAMs only                                                                                                                             |
| 26            | S.pam                   | Samples with Switches                                                                                                                              |
| 27            | N.pam                   | Rest of samples                                                                                                                                    |
| 28            | p.pam.me                | p-value of the mutual exclusion test                                                                                                               |
| 29            | MS.mut                  | Samples with co-occurrence of switch and WGS mutations                                                                                             |
| 30            | M.mut                   | Samples with WGS mutations only                                                                                                                    |
| 31            | S.mut                   | Samples with Switches                                                                                                                              |
| 32            | N.mut                   | Rest of samples                                                                                                                                    |
| 33            | p.mut.o                 | p-value of the co-occurrence of mutations and switches                                                                                             |

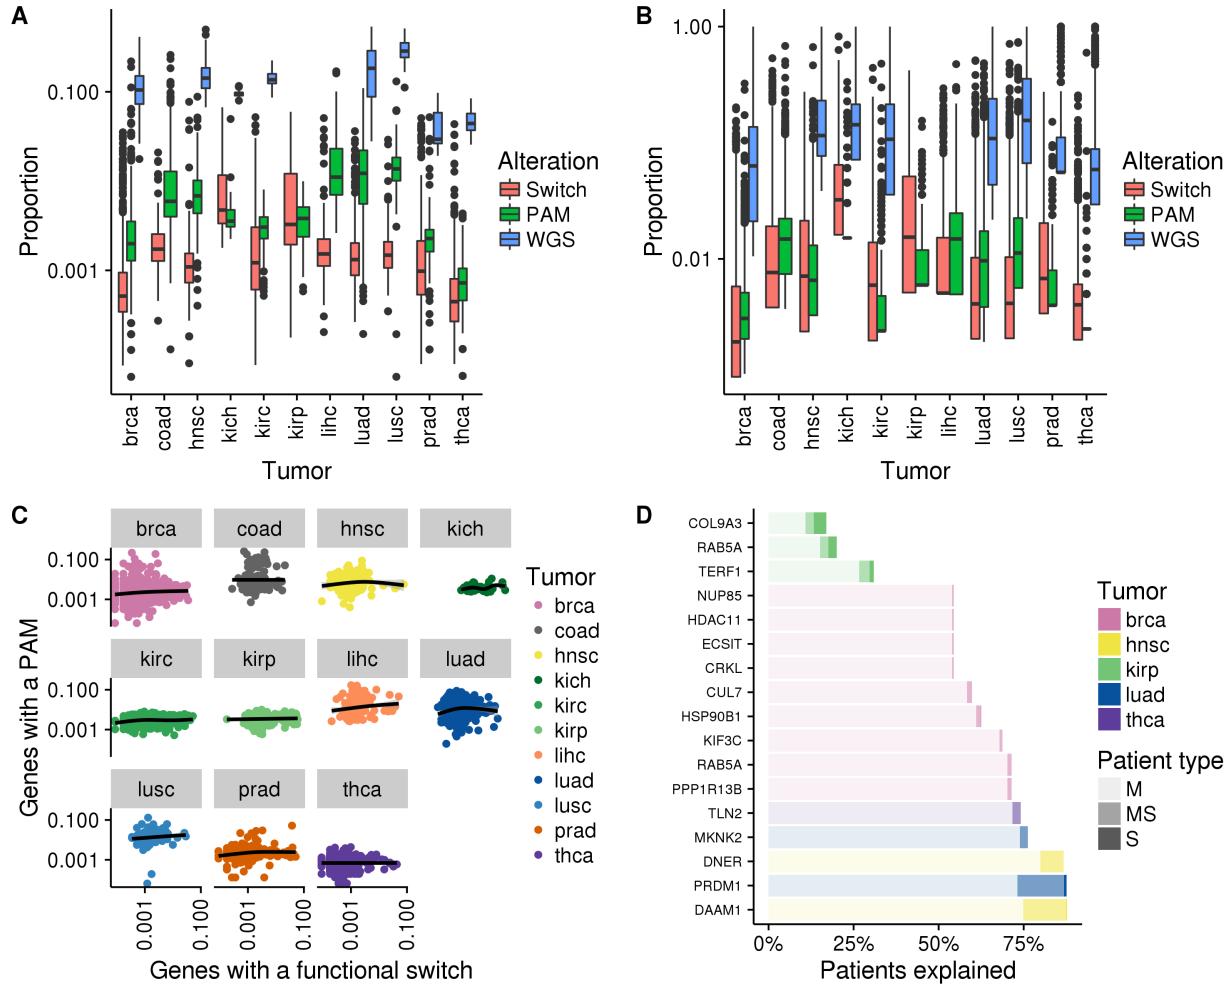

**Figure S2. Properties of functional isoform switches in tumors.** Related to Figure 2. **(A)** Proportion of genes in  $\log_{10}$  scale ( $y$ -axis) with either of the three alterations: isoform switches (red), protein-affecting mutations (PAMs) (green), and any mutation type from whole genome sequencing (WGS) data (blue). **(B)** Proportion of samples ( $y$ -axis) with either of the three studied alterations: isoform switches (red), protein-affecting mutations (PAMs) (green), and any mutation type from whole genome sequencing (WGS) data (blue). **(C)** For each tumor type, each dot represents a sample according to the number of genes with a functional switch ( $x$ -axis) and the number of genes with protein-affecting mutations (PAMs) ( $y$ -axis). **(D)** Functional switches that potentially characterize pan-negative tumor samples. For each switch along the  $y$ -axis, we represent the proportion of patients from a given tumor type ( $x$ -axis) that harbor mutations in a tumor-specific mutational driver (M), have the switch (S), or have both (MS). The switches are ranked from the bottom of the  $y$ -axis according to the total number of patients explained. Only the top 30 cases are shown. Each case is color-coded according to tumor type. We considered as pan-negative those patients who do not harbor mutations in at least the top three mutated drivers in that tumor type.

**Table S2. Mutation and domain gain/loss enrichments in protein domain families.** Related to Figure 2. Provided as a text file with tab-separated values (.tsv). This table contains the information about the Protein domain families that are significantly enriched in mutations as well as gains or losses in isoform switches. The information provided for each domain family is the following:

| Column number | Column label          | Description                                      |
|---------------|-----------------------|--------------------------------------------------|
| 1             | Pfam_id               | PFAM ID for the domain family                    |
| 2             | Name                  | Name of the domain family                        |
| 3             | p_switch_gain         | P-value for the gain-test                        |
| 4             | adjp_switch_gain      | Adjusted P-value for the gain-test               |
| 5             | p_switch_loss         | P-value for the loss-test                        |
| 6             | adjp_switch_loss      | Adjusted P-value for the loss-test               |
| 7             | p_mutation            | P-value for the mutation-test                    |
| 8             | adjp_mutation         | Adjusted P-value for the mutation-test           |
| 9             | Switches_where_gained | Number of switches where domain family is gained |
| 10            | Switches_where_lost   | Number of switches where domain family is lost   |

**Table S3. Mutual exclusion analysis between switches and cancer drivers.** Related to Figure 2. Provided as a text file with tab-separated values (.tsv). This table contains the analysis of mutual exclusion between functional switches and mutational drivers in the same pathway:

| Column number | Column label        | Description                                                                     |
|---------------|---------------------|---------------------------------------------------------------------------------|
| 1             | Tumor               | Tumor type (brca, coad, etc...)                                                 |
| 2             | Genelid             | Entrez gene ID                                                                  |
| 3             | Symbol              | HGNC gene symbol                                                                |
| 4             | Normal_transcript   | UCSC transcript id                                                              |
| 5             | Tumor_transcript    | UCSC transcript id                                                              |
| 6             | p_pannegative       | P-value for the test for mutual exclusion (ME) with mutational drivers          |
| 7             | Number_ME_drivers   | Number of drivers with ME                                                       |
| 8             | ME_drivers          | HGNC gene symbols for the ME drivers                                            |
| 9             | Same_pathway_driver | Pathways shared with ME drivers                                                 |
| 10            | p_me_pathway_driver | P-value for the test for mutual exclusion (ME) with drivers in the same pathway |

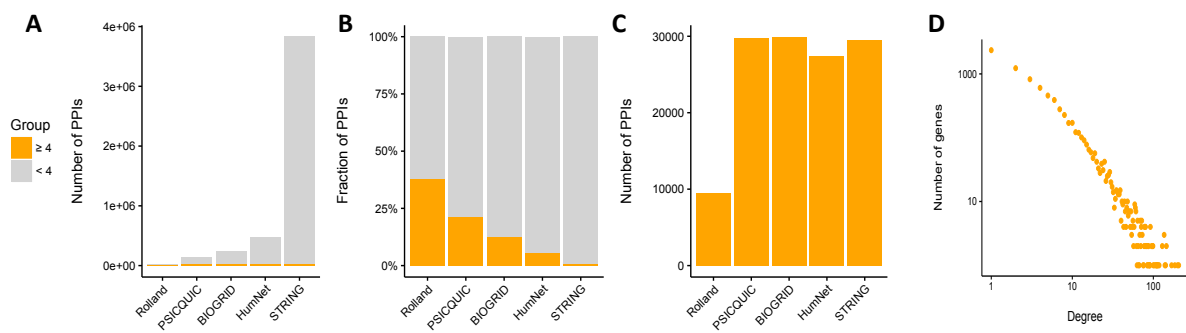

**Figure S3. Protein-protein interaction network.** Related to Figure 3. **(A)** Consensus protein-protein interaction (PPI) network. We used data from five different sources: PSICQUIC, BIOGRID, HumNet, STRING, and (Rolland et al., 2014). These networks vary in their size, connectivity, and origin, with PSICQUIC, BIOGRID, and Rolland being experimental networks and HumNet and STRING being functional networks. To build our consensus network, we used only those interactions that were defined in at least four different networks (shown in orange). **(B)** Fraction of each network included in the consensus network, with the data from (Rolland et al., 2014) having over 30% of its interactions and STRING less than 5%. **(C)** Number of interactions from each network included in the consensus network. **(D)** Degree distribution of the consensus network. For each number of PPI connections ( $x$ -axis), we give the number of genes with this degree ( $y$ -axis).

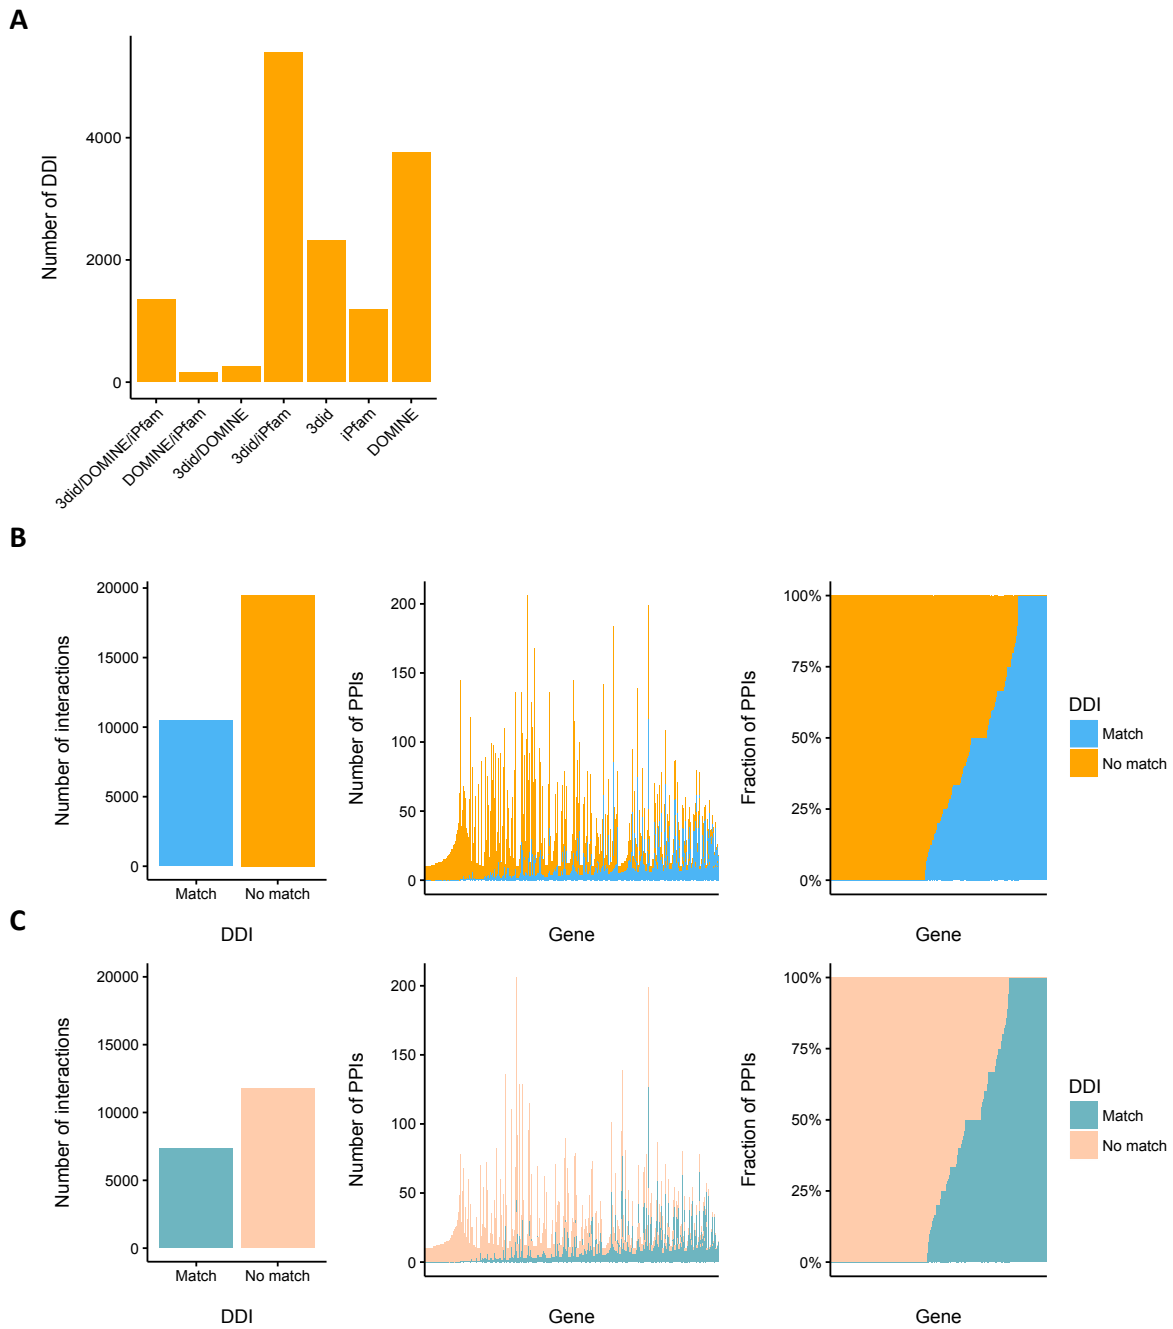

**Figure S4. Protein-protein interactions assigned to functional isoform switches.** Related to Figure 3. **(A)** Number of domain–domain interactions (DDIs) analyzed, separated by source: 3did, iPfam, DOMINE. **(B)** Protein interactions from the consensus network mapped to domain–domain interactions (DDIs). Left panel: We mapped to at least one DDI a total of 10,487 of the 29,991 interactions in the consensus network (35%). Middle panel: Absolute number of PPI interactions mapped (orange) or not mapped (blue) to a DDI in each gene (only genes with at least 10 PPIs are depicted). Genes are sorted according to the fraction of interactions that could

be mapped to DDIs. The picture shows no correlation between the degree of a gene and the fraction of interactions mapped. Right panel: Fraction of PPIs mapped to DDIs per gene. For 4,560 of the 8,142 genes in our network (56%), at least one interaction could be mapped. Genes are sorted according to the fraction of PPIs successfully mapped to DDIs. **(C)** These panels show the same as in (B) for genes with isoform switches.



**A**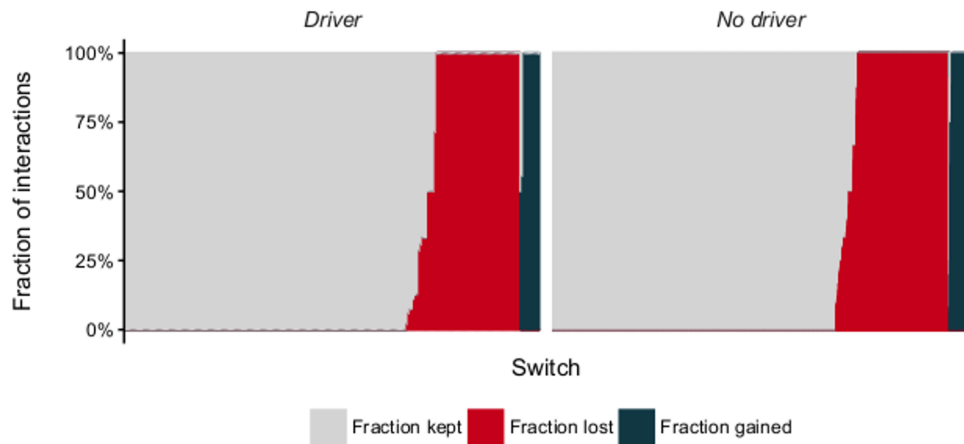**B**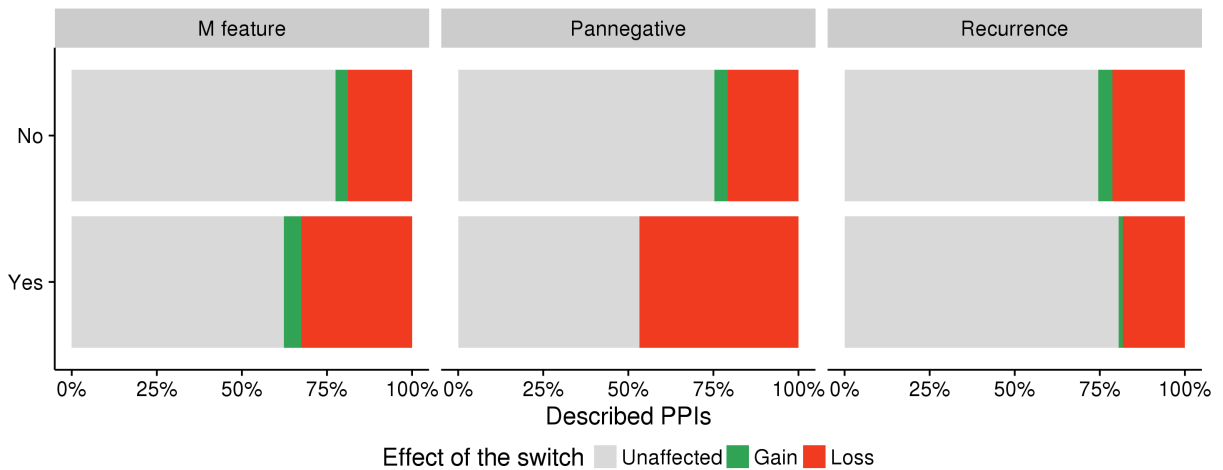

**Figure S5. Properties of switches that affect protein-protein interactions.** Related to Figure 3. **(A)** The figure depicts the fraction of interactions lost (red) or gained (black) for each switch with mapped domain–domain interactions (DDI) ( $x$ -axis). Interactions are separated according to whether they occur in drivers (left panel) or non-drivers (right panel). **(B)** Comparison of proportions of functional switches that affect protein-protein interactions. In the left panel, functional switches are divided according to whether they affect domains frequently mutated in cancer (M feature) (Yes) or not (No). In the middle panel, functional switches are divided according to whether the switch has mutual exclusion with tumor-specific drivers (pan-negative). In the right panel, functional switches are divided according to whether they are recurrent (Yes) or not (No). In each subset we plot the proportion of PPIs that are kept intact (gray), are lost (red), or are gained (green).

**Table S4. Protein features and protein-protein interactions affected by isoform switches.** Related to Figure 3. Provided as a text file with tab-separated values (.tsv). This table contains the proteins features and protein–protein interactions affected in each functional switch. The column descriptions are:

| Column number | Column label          | Description                                                              |
|---------------|-----------------------|--------------------------------------------------------------------------|
| 1             | Tumor                 | Tumor type (brca, coad, etc...)                                          |
| 2             | Genelid               | Entrez gene ID                                                           |
| 3             | Symbol                | HGNC gene symbol                                                         |
| 4             | Normal_transcript     | UCSC transcript id                                                       |
| 5             | Tumor_transcript      | UCSC transcript id                                                       |
| 6             | Feature_type          | Pfam, Prosite, IUPRED, ANCHOR                                            |
| 7             | Pfam_id               | ID for the protein feature if available                                  |
| 8             | Name                  | Name of Feature if available, positions in protein for IUPRED and ANCHOR |
| 9             | Observation           | Gained_in_tumor/Lost_in_tumor/No_change                                  |
| 10            | Normal_isoform_order  | Domain copy this corresponds to / total copies in normal isoform         |
| 11            | Tumor_isoform_order   | Domain copy this corresponds to / total copies in tumor isoform          |
| 12            | Genelid_partner       | Entrez ID of the protein-protein interaction partner                     |
| 13            | Symbol_partner        | HGNC symbol of the protein-protein interaction partner                   |
| 14            | Transcript_partner    | Transcripts identified as coding the interaction partner                 |
| 15            | Pfam_id_partner       | PFAM ID for the domain mediating the interaction                         |
| 16            | Effect_on_interaction | Unaffected/Gain/Loss/NA(no interaction data)                             |

**Table S5. Pathways enriched in PPI-affecting switches.** Related to Figure 3. Provided as a text file with tab-separated values (.tsv). This table contains the gene sets that are enriched in isoform switches that are predicted to affect protein-protein interactions. The enrichment tests is a Fisher’s exact test based on the separations of switches being in the pathway or not, and affecting PPIs or not. We have tested Pathways, Complexes and gene sets-related to mRNA-metabolism. Only Pathways showed enrichment after multiple-test correction. The column descriptions are:

| Column number | Column label   | Description                                            |
|---------------|----------------|--------------------------------------------------------|
| 1             | Geneset_type   | Pathway/Complex/mRNA_regulation                        |
| 2             | Geneset        | Name of the gene set                                   |
| 3             | Number_drivers | Number of drivers in the gene set.                     |
| 4             | p              | Fisher’s exact test p-value                            |
| 5             | adjp           | p-value corrected for multiple testing                 |
| 6             | OR             | Odds-ratio                                             |
| 7             | eOR            | Estimated odds-ration using with pseudocounts          |
| 8             | Switched_genes | Genes in the gene set that have a PPI-affecting switch |

**Table S6. Gene modules with protein-protein interactions affected by isoform switches.** Related to Figure 3. Provided as a text file with tab-separated values (.tsv). This table contains modules with high density of affect interactions: sets of genes that are connected in the network of protein-protein interactions and many of their interactions affected by the isoform switches and separately from other genes in the PPI network. We provide a test for assigning a complex or pathway based on the intersection of the complex/pathway to the module (see Experimental Procedures for details). The column descriptions are:

| Column number | Column label      | Description                                                                                                    |
|---------------|-------------------|----------------------------------------------------------------------------------------------------------------|
| 1             | Module            | Module number                                                                                                  |
| 2             | Module_components | Genes in the module (calculated from the network of protein-protein interactions affected by isoform switches) |
| 3             | Geneset           | Name of complex/pathway compared to the module (NA if none was assigned)                                       |
| 4             | Geneset_size      | Number of genes in the complex/pathway (NA if none was assigned)                                               |
| 5             | p                 | p-value from binomial test for the intersection of the gene set (Complex/Pathway) to the module                |
| 6             | Intersection      | Number of genes from the gene set that are in the module                                                       |
| 7             | Number_drivers    | Number of cancer drivers in the module                                                                         |
| 8             | padj              | p-value corrected for multiple testing                                                                         |

# Supplemental Experimental Procedures

## Comparison with stromal and immune signatures

To determine whether the splicing changes observed merely reflect the cellular content of the samples, we measured the significant association with stroma and immune cell content using ESTIMATE (Yoshihara et al., 2013). For each switch we performed a Wilcoxon test to compare the ESTIMATE scores between patients with and without the switch. After correcting for multiple testing (Benjamini-Hochberg method), we found 819 and 240 exclusively associated (FDR < 0.05) with stromal and immune cell content, respectively; and 206 associated with both. These were eliminated from our analyses, as we could not be sure whether they are from the tumor cells.

## Association between somatic mutations and isoform switches

Mutation data were downloaded from the TCGA data portal for all tumor types in the form of MAF files containing Level 2 somatic mutation calls from whole exome and Level 3 SNP array data. Additionally, we used somatic mutations from whole genome sequence (WGS) data for the 505 samples studied in (Fredriksson et al., 2014). For each transcript, its relative abundance or PSI was calculated as the fraction of the total gene expression (in TPM scale) explained by this transcript.

We compared the distributions of somatic mutations and functional switches across tumor samples. Using somatic coding and noncoding mutations from whole genome sequencing (WGS) data, the proportion of genes with multiple isoforms undergoing a functional switch per patient is on average about two orders of magnitude lower than the proportion of genes with mutations (Figure S2A). For protein-affecting mutations (PAMs), however, both distributions become more similar (Figure S2A). Likewise, the distribution of patients with switches is more similar to the distribution for PAMs than to the distribution for WGS mutations (Figure S2B).

We then tested the association of somatic mutations with functional switches by measuring the co-occurrence between switches and mutations as the proportion of patients with switches that also have mutations. This analysis showed higher proportions of functional switches and WGS mutations in cancer drivers compared to the rest of the genes (Wilcoxon test p-value < 0.0047). This higher co-occurrence is maintained when restricting to PAMs from WES data (p-value < 0.003). Nevertheless, only 16 (0.23%) functional switches show a significant association with somatic mutations (Fisher's exact test p-value < 0.05). Additionally, we found no correlation between the number of mutations and the number of switches per sample (Supplemental Figure 2C), and the majority of functional switches and PAMs in the same gene do not occur in the same sample. This suggests that the majority of functional switches may occur through trans-acting alterations (Sebestyén et al., 2016), such as the oncogenic splicing change in *RAC1* (Zhou et al., 2012), which is regulated by expression changes in hnRNP A1 and SR proteins (Gonçalves et al., 2009; Pelisch et al., 2012). On the other hand, genetic alterations affecting

splicing may involve small copy-number changes and micro-deletions in intronic regions that are hard to detect with WES and WGS data. As an example, a recurrent small deletion in TP73 was found recently in association to exon skipping in small cell lung cancer patients using WGS data (George et al., 2015). More targeted searches or deeper sequencing may be necessary to fully uncover such cases at genome-scale in other tumors.

### **Annotation of cancer gene drivers as oncogenes or tumor suppressors**

We used the annotations provided by COSMIC (Forbes et al., 2015), by Vogelstein et al. (Vogelstein et al., 2013), and by the TSGene database (Zhao et al., 2015). Unlabeled cases were predicted with OncodriveROLE (Schroeder et al., 2014) using cutoffs 0.3 (loss-of-function class) and 0.7 (activating class).

## Supplemental References

- Forbes, S.A., Beare, D., Gunasekaran, P., Leung, K., Bindal, N., Boutselakis, H., Ding, M., Bamford, S., Cole, C., Ward, S., Kok, C.Y., Jia, M., De, T., Teague, J.W., Stratton, M.R., McDermott, U., Campbell, P.J., 2015. COSMIC: Exploring the world's knowledge of somatic mutations in human cancer. *Nucleic Acids Res.* 43, D805–D811. doi:10.1093/nar/gku1075
- Fredriksson, N.J., Ny, L., Nilsson, J.A., Larsson, E., 2014. Systematic analysis of noncoding somatic mutations and gene expression alterations across 14 tumor types. *Nat. Genet.* 46, 1–7. doi:10.1038/ng.3141
- George, J., Lim, J.S., Jang, S.J., Cun, Y., Ozretic, L., Kong, G., Leenders, F., Lu, X., Fernandez-Cuesta, L., Bosco, G., Muller, C., Dahmen, I., Jahchan, N.S., Park, K.-S., Yang, D., Karnezis, A.N., Vaka, D., Torres, A., Wang, M.S., Korbel, J.O., Menon, R., Chun, S.-M., Kim, D., Wilkerson, M., Hayes, N., Engelmann, D., Putzer, B., Bos, M., Michels, S., Vlastic, I., Seidel, D., Pinther, B., Schaub, P., Becker, C., Altmuller, J., Yokota, J., Kohno, T., Iwakawa, R., Tsuta, K., Noguchi, M., Muley, T., Hoffmann, H., Schnabel, P.A., Petersen, I., Chen, Y., Soltermann, A., Tischler, V., Choi, C., Kim, Y.-H., Massion, P.P., Zou, Y., Jovanovic, D., Kontic, M., Wright, G.M., Russell, P.A., Solomon, B., Koch, I., Lindner, M., Muscarella, L.A., la Torre, A., Field, J.K., Jakopovic, M., Knezevic, J., Castanos-Velez, E., Roz, L., Pastorino, U., Brustugun, O.-T., Lund-Iversen, M., Thunnissen, E., Kohler, J., Schuler, M., Botling, J., Sandelin, M., Sanchez-Cespedes, M., Salvesen, H.B., Achter, V., Lang, U., Bogus, M., Schneider, P.M., Zander, T., Ansen, S., Hallek, M., Wolf, J., Vingron, M., Yatabe, Y., Travis, W.D., Nurnberg, P., Reinhardt, C., Perner, S., Heukamp, L., Buttner, R., Haas, S.A., Brambilla, E., Peifer, M., Sage, J., Thomas, R.K., 2015. Comprehensive genomic profiles of small cell lung cancer. *Nature* 524, 47–53. doi:10.1038/nature14664
- Gonçalves, V., Matos, P., Jordan, P., 2009. Antagonistic SR proteins regulate alternative splicing of tumor-related Rac1b downstream of the PI3-kinase and Wnt pathways. *Hum. Mol. Genet.* 18, 3696–3707. doi:10.1093/hmg/ddp317

- Pelisch, F., Khauv, D., Risso, G., Stallings-Mann, M., Blaustein, M., Quadrana, L., Radisky, D.C., Srebrow, A., 2012. Involvement of hnRNP A1 in the matrix metalloprotease-3-dependent regulation of Rac1 pre-mRNA splicing. *J. Cell. Biochem.* 113, 2319–2329. doi:10.1002/jcb.24103
- Rolland, T., Taşan, M., Charlotheaux, B., Pevzner, S.J., Zhong, Q., Sahni, N., Yi, S., Lemmens, I., Fontanillo, C., Mosca, R., Kamburov, A., Ghiassian, S.D., Yang, X., Ghamsari, L., Balcha, D., Begg, B.E., Braun, P., Brehme, M., Broly, M.P., Carvunis, A.R., Convery-Zupan, D., Corominas, R., Coulombe-Huntington, J., Dann, E., Dreze, M., Dricot, A., Fan, C., Franzosa, E., Gebreab, F., Gutierrez, B.J., Hardy, M.F., Jin, M., Kang, S., Kiros, R., Lin, G.N., Luck, K., Macwilliams, A., Menche, J., Murray, R.R., Palagi, A., Poulin, M.M., Rambout, X., Rasla, J., Reichert, P., Romero, V., Ruysinck, E., Sahalie, J.M., Scholz, A., Shah, A.A., Sharma, A., Shen, Y., Spirohn, K., Tam, S., Tejada, A.O., Trigg, S.A., Twizere, J.C., Vega, K., Walsh, J., Cusick, M.E., Xia, Y., Barabási, A.L., Iakoucheva, L.M., Aloy, P., De Las Rivas, J., Tavernier, J., Calderwood, M.A., Hill, D.E., Hao, T., Roth, F.P., Vidal, M., 2014. A proteome-scale map of the human interactome network. *Cell* 159, 1212–1226. doi:10.1016/j.cell.2014.10.050
- Schroeder, M.P., Rubio-Perez, C., Tamborero, D., Gonzalez-Perez, A., Lopez-Bigas, N., 2014. OncodriveROLE classifies cancer driver genes in loss of function and activating mode of action, in: *Bioinformatics*. doi:10.1093/bioinformatics/btu467
- Sebestyén, E., Singh, B., Miñana, B., Pagès, A., Mateo, F., Pujana, M.A., Valcárcel, J., Eyras, E., 2016. Large-scale analysis of genome and transcriptome alterations in multiple tumors unveils novel cancer-relevant splicing networks. *Genome Res.* 26. doi:10.1101/gr.199935.115
- Vogelstein, B., Papadopoulos, N., Velculescu, V.E., Zhou, S., Diaz Jr., L.A., Kinzler, K.W., 2013. Cancer Genome Landscapes. *Science* (80- ). 339, 1546–1558. doi:10.1126/science.1235122
- Yoshihara, K., Shahmoradgoli, M., Martínez, E., Vegesna, R., Kim, H., Torres-Garcia, W., Treviño, V., Shen, H., Laird, P.W., Levine, D. a, Carter, S.L., Getz, G., Stemke-Hale, K., Mills, G.B., Verhaak, R.G.W., 2013. Inferring tumour purity and stromal and immune cell admixture from expression data. *Nat. Commun.* 4, 2612. doi:10.1038/ncomms3612
- Zhao, M., Kim, P., Mitra, R., Zhao, J., Zhao, Z., 2015. TSGene 2.0: an updated literature-based knowledgebase for tumor suppressor genes. *Nucleic Acids Res.* 1–9. doi:10.1093/nar/gkv1268
- Zhou, C., Licciulli, S., Avila, J.L., Cho, M., Troutman, S., Jiang, P., Kossenkov, a V, Showe, L.C., Liu, Q., Vachani, a, Albelda, S.M., Kissil, J.L., 2012. The Rac1 splice form Rac1b promotes K-ras-induced lung tumorigenesis. *Oncogene* 32, 903–909. doi:10.1038/onc.2012.99
